# Supplementary material for: Food supply confers calcifiers resistance to ocean acidification
Source: Springer Nature journal article supplement (doi:10.1038/srep19374), 2016-01-18

## **SUPPLEMENTARY MATERIAL**

Food supply confers calcifiers resistance to ocean acidification

Laura Ramajo\*, Elia Pérez-León, Iris E. Hendriks, Núria Marbà, Dorte Krause-Jensen, Mikael K. Sejr, Martin E. Blicher, Nelson A. Lagos, Ylva S. Olsen, and Carlos M. Duarte

**Table S1.** Studies, taxa, species, life stage, experimental pCO<sub>2</sub> and food levels used in the experimental studies included in the meta-analysis.

| Reference <sup>1</sup>             | Taxa       | Species                              | Life Stage         | <i>pCO<sub>2</sub></i> Treatments |                                                                     | Food Treatments                                                                                                                                     |
|------------------------------------|------------|--------------------------------------|--------------------|-----------------------------------|---------------------------------------------------------------------|-----------------------------------------------------------------------------------------------------------------------------------------------------|
|                                    |            |                                      |                    | Control                           | OA                                                                  |                                                                                                                                                     |
| Edmunds (2011)                     | Coral      | <i>Porites spp.</i>                  | Juvenile           | 41.6 (Pa)                         | 81.5 (Pa)                                                           | HF: Fed ( <i>ad libitum</i> )<br>LF: Unfed (starvation)<br>HF <sup>4</sup> : 1600–2000 cells mL <sup>-1</sup><br>LF: 310–350 cells mL <sup>-1</sup> |
| Melzner <i>et al.</i> , (2011)     | Mollusc    | <i>Mytilus edulis</i>                | Juvenile           | 390 (ppm)                         | 1120, 2400 and 4000 (ppm)                                           | HF <sup>4</sup> : 1600–2000 cells mL <sup>-1</sup><br>LF: 310–350 cells mL <sup>-1</sup>                                                            |
| Thomsen <i>et al.</i> , (2013)     | Mollusc    | <i>Mytilus edulis</i>                | Juvenile           | 380 (µatm)                        | 1120, 2400 and 4000 (µatm)                                          | 10 (HF) : 5 (IF) : 1(LF)                                                                                                                            |
| Hettinger <i>et al.</i> , (2013)   | Mollusc    | <i>Ostrea lurida</i>                 | Larvae             | 500 (µatm)                        | 1000 (µatm)                                                         | 50 (HF) <sup>4</sup> : 25 (IF) : 5(LF)                                                                                                              |
| Crook <i>et al.</i> , (2013)       | Coral      | <i>Balanophyllia elegans</i>         | Larvae             | 410 (µatm)                        | 770 and 1220 (µatm)                                                 | HF: Every 3 days<br>LF: Once during all experiment                                                                                                  |
| Comeau <i>et al.</i> , (2013)      | Coral      | <i>Porites rus</i>                   | Adult              | 400 (µatm)                        | 700 (µatm)                                                          | HF <sup>4</sup> : Fed ( <i>ad libitum</i> )<br>LF: Unfed (starvation)<br>HF <sup>4</sup> : Similar to environment                                   |
| Drenkard <i>et al.</i> , (2013)    | Coral      | <i>Favia fragum</i>                  | Juvenile           | 421 (µatm)                        | 1311 (µatm)                                                         | LF: Unfed (starving)                                                                                                                                |
| Pansch <i>et al.</i> , (2014)      | Crustacean | <i>Amphibalanus improvisus</i>       | Juvenile/<br>Adult | Ambient (atmospheric air)         | 1120 and 4000 (ppm) <sup>2</sup><br>977 and 3000 (ppm) <sup>3</sup> | 5(HF) : 1(LF)                                                                                                                                       |
| Oddvarstodter (2014)               | Crustacean | <i>Calanus finmarchicus</i>          | Larvae             | 380 (ppm)                         | 2080 (ppm)                                                          | HF: 600 µgC L <sup>-1</sup><br>LF: 150 µgC L <sup>-1</sup>                                                                                          |
| Pan <i>et al.</i> , (2015)         | Echinoderm | <i>Strongylocentrotus purpuratus</i> | Larvae             | Ambient (atmospheric air)         | 800 (µatm)                                                          | HF: Fed ( <i>ad libitum</i> )<br>LF: Unfed                                                                                                          |
| Towle <i>et al.</i> , (2015)       | Coral      | <i>Acropora cervicornis</i>          | Adult              | 390 (ppm)                         | 800 (ppm)                                                           | HF: Fed ( <i>ad libitum</i> )<br>LF: Unfed (starvation)<br>HF <sup>4</sup> : 5% ind DW d <sup>-1</sup>                                              |
| Ramajo <i>et al.</i> , (submitted) | Mollusc    | <i>Argopecten purpuratus</i>         | Juvenile           | 450 (µatm)                        | 1400 (µatm)                                                         | IF: 2% ind DW d <sup>-1</sup><br>LF: 0.1% ind DW d <sup>-1</sup>                                                                                    |

<sup>2</sup>Kiel population <sup>3</sup>Tjärnö population <sup>4</sup>similar to environment or ecologically-relevant

<sup>1</sup>References

Edmunds PJ (2011). *Limnology and Oceanography* 56(6): 2402-2410.

Melzner et al. (2011). *PlosOne* 6(9): e24223.

Thomsen et al. (2013). *Global Change Biology* 19: 1017-1027.

Hettinger et al. (2013). *Biogeosciences* 10: 6629-6638.

Crook et al. (2013). *Biogeosciences* 10: 7599-7608.

Comeau et al. (2013). *Marine Biology* 160: 1127-1134.

Drenkard et al. (2013). *Coral Reefs* 32: 727-735.

Pansch et al. (2014). *Global Change Biology* 20: 765-777

Oddvarstodter (2014). Master Thesis. Norges teknisk-naturvitenskapelige universitet. (<http://urn.kb.se/resolve?urn=urn:nbn:no:ntnu:diva-25205>)

Pan et al. (2015). *PNAS* 112 (15): 4696–4701,

Towle et al. (2015). *PlosOne*. doi:10.1371/journal.pone.0123394.

Ramajo et al. (accepted). Biomineralization changes with food supply confer juvenile scallops (*Argopecten purpuratus*) resistance to ocean acidification. *Global Change Biology*

**Table S2.** Effect of the magnitude of pH reduction ( $\Delta\text{pH}$ ) on effect sizes (LnRR) on calcification and growth responses for high (HF), intermediate (IF) and low (LF) food treatments. \*denotes significant effect ( $\alpha = 0.05$ )

| Response      | Food | df | Slope  | P-value |
|---------------|------|----|--------|---------|
| Calcification | HF   | 13 | -1.026 | 0.019*  |
|               | IF   | 3  | -2.996 | 0.068   |
|               | LF   | 13 | -2.197 | 0.067   |
| Growth        | HF   | 18 | -0.386 | 0.066   |
|               | IF   | 3  | -1.065 | 0.189   |
|               | LF   | 18 | -0.111 | 0.837   |

**Figure S1.** LnRR estimates for calcification (a) and growth (b) responses with individual observations plotted against  $\Delta\text{pH}$  (pH reduction from control conditions). The solid (significant) and dotted (not significant) lines show the fitted regression of effect sizes versus  $\Delta\text{pH}$  for each food treatment.

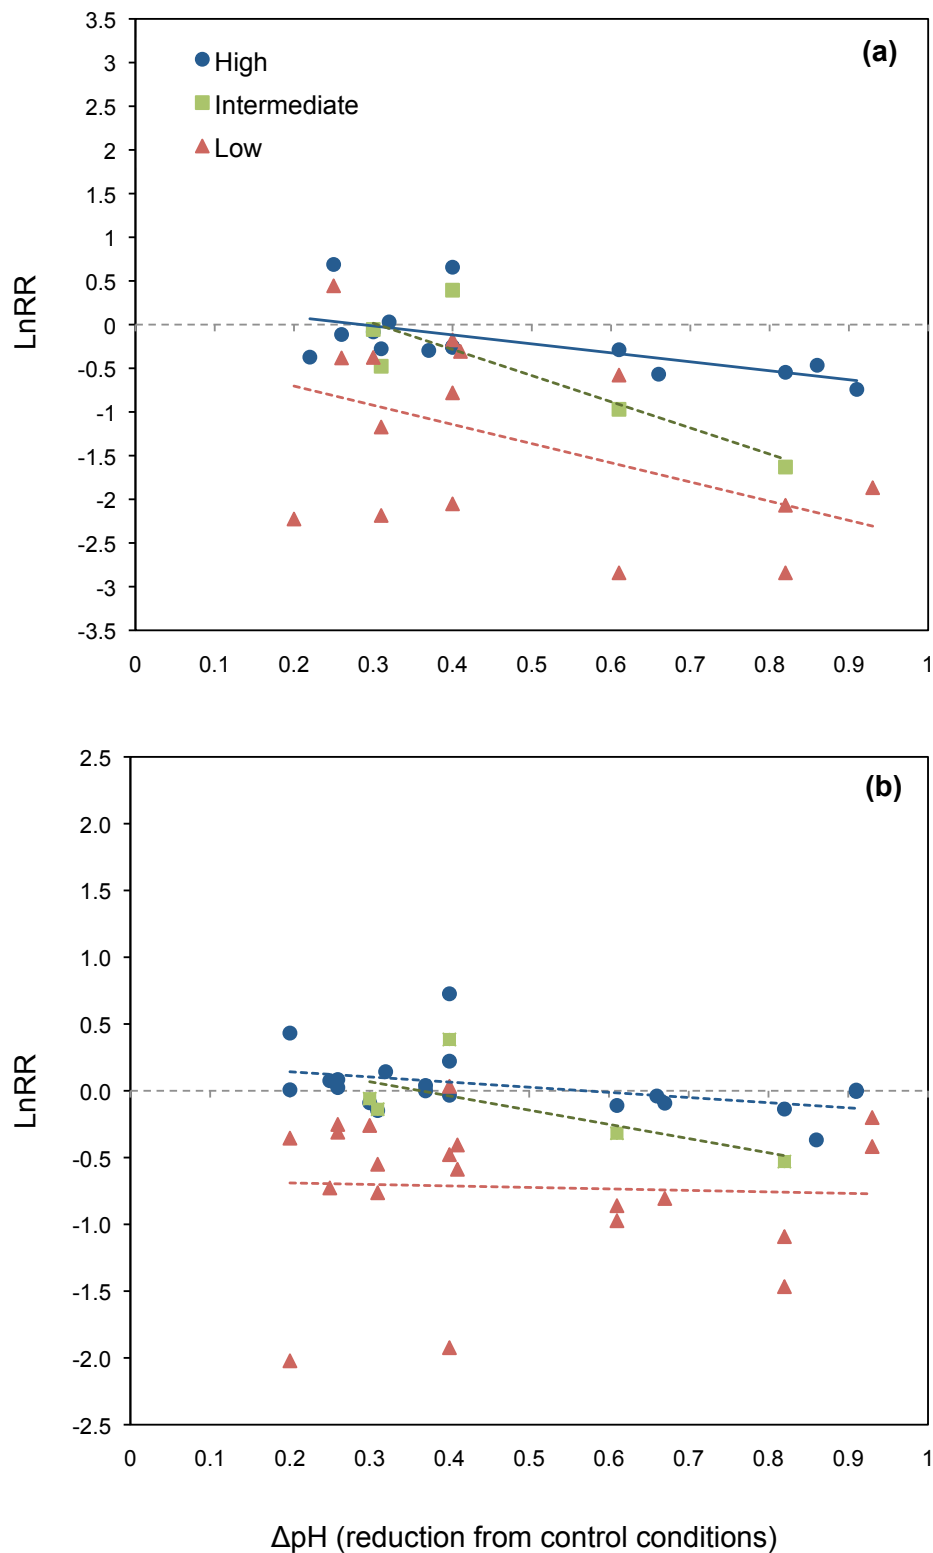

Supplement: 41598_2016_BFsrep19374_MOESM1_ESM.pdf [file 41598_2016_BFsrep19374_MOESM1_ESM.pdf]
